# Supplementary material for: Effect of Low Temperature on Photosynthetic Characteristics, Senescence Characteristics, and Endogenous Hormones of Winter Wheat “Ji Mai 22” during the Jointing Stage
Source: MDPI journal article supplement (doi:10.3390/agronomy13102650), 2023-10-21
Supplement: s1 [file s1]

## Supplementary Material

Table S1. Two-way analysis of variance for the effects of temperature and duration on chlorophyll content.

|                | <b>chl<sub>a</sub></b> | <b>chl<sub>b</sub></b> | <b>chl(a+b)</b> | <b>car</b> |
|----------------|------------------------|------------------------|-----------------|------------|
| Temperature(T) | 108.7**                | 191.1**                | 164.2**         | 71.2**     |
| Stress days(S) | 360.9**                | 60.8**                 | 307.8**         | 173.6**    |
| T×S            | 57.3**                 | 133.5**                | 98.2**          | 60.0*      |

1.Numerical values represent the F-values under the two-way analysis of variance.

2.\*\* denotes a highly significant correlation at  $P<0.01$ , \* denotes a significant correlation at  $P<0.05$ .

Table S2. Two-way analysis of variance for the effects of temperature and duration on the activity of protective enzymes.

|                | <b>CAT</b> | <b>SOD</b> | <b>POD</b> |
|----------------|------------|------------|------------|
| Temperature(T) | 640.1**    | 410.0**    | 144.4**    |
| Stress days(S) | 4.1**      | 9.9**      | 24.3**     |
| T×S            | 54.8**     | 7.4*       | 46.1**     |

1.Numerical values represent the F-values under the two-way analysis of variance.

2.\*\* denotes a highly significant correlation at  $P<0.01$ , \* denotes a significant correlation at  $P<0.05$ .

Table S3. Two-way analysis of variance for the effects of temperature and duration on endogenous hormones.

|                | <b>ZT</b> | <b>GA</b> | <b>IAA</b> | <b>ABA</b> |
|----------------|-----------|-----------|------------|------------|
| Temperature(T) | 56.6**    | 220.39*   | 141.8**    | 41.8**     |
| Stress days(S) | 1445.9**  | 669.0**   | 1549.8*    | 1913.0**   |
| T×S            | 605.7**   | 62.0**    | 495.7**    | 225.9**    |

1.Numerical values represent the F-values under the two-way analysis of variance.

2.\*\* denotes a highly significant correlation at  $P<0.01$ , \* denotes a significant correlation at  $P<0.05$ .
