# Supplementary material for: Effect of Low Temperature on Photosynthetic Characteristics, Senescence Characteristics, and Endogenous Hormones of Winter Wheat “Ji Mai 22” during the Jointing Stage
Source: MDPI journal article supplement (doi:10.3390/agronomy13102650), 2023-10-21
Supplement: s1 [file s1]

Archive with 1 entries (1 files):
- agronomy-2664686-supplementary.pdf
